# Supplementary material
Source: MDPI journal article supplement (https://www.mdpi.com/2673-8236/4/2/7)
Supplement: s1 [file s1]

*Difference between transient and persistent AKI*

| Characteristic                        | N  | Overall, N = 80 <sup>1</sup> | 0, N = 68 <sup>1</sup> | 1, N = 12 <sup>1</sup> | p-value <sup>2</sup> |
|---------------------------------------|----|------------------------------|------------------------|------------------------|----------------------|
| Preoperative egfr                     | 80 | 88 (72, 98)                  | 88 (80, 99)            | 76 (62, 92)            | 0.091                |
| criterion_aki_1_scr_2_diuresis_3_both | 80 |                              |                        |                        | <b>0.022</b>         |
| 1                                     |    | 23 (29%)                     | 18 (26%)               | 5 (42%)                |                      |
| 2                                     |    | 46 (57%)                     | 43 (63%)               | 3 (25%)                |                      |
| 3                                     |    | 11 (14%)                     | 7 (10%)                | 4 (33%)                |                      |
| aki_stage                             | 80 |                              |                        |                        | <b>0.003</b>         |
| 1                                     |    | 59 (74%)                     | 51 (75%)               | 8 (67%)                |                      |
| 2                                     |    | 18 (22%)                     | 17 (25%)               | 1 (8.3%)               |                      |
| 3                                     |    | 3 (3.8%)                     | 0 (0%)                 | 3 (25%)                |                      |

<sup>1</sup>Median (IQR); n (%)

<sup>2</sup>Wilcoxon rank sum test; Fisher's exact test
