# Supplementary material
Source: MDPI journal article supplement (https://www.mdpi.com/2673-8236/4/2/7)
Supplement: s1 [file s1]

*Effect of postoperative kidney events on ICU and hospital length of stay*

Outcome: ICU length of stay

- aki\_0\_no\_1\_yes:**

| factor          | AME    | lower       | upper | p      |
|-----------------|--------|-------------|-------|--------|
| aki_0_no_1_yes1 | 0.5895 | -<br>0.5006 | 1.68  | 0.2892 |

- Criterion\_aki\_1\_scr\_2\_diuresis\_3\_both:**

| factor                                    | AME             | lower           | upper     | p           |
|-------------------------------------------|-----------------|-----------------|-----------|-------------|
| criterio_per_aki_1_scr_2_diuresis_3_both2 | -<br>0.16<br>26 | -<br>1.37       | 1.0<br>45 | 0.791<br>8  |
| criterio_per_aki_1_scr_2_diuresis_3_both3 | 3.21<br>1       | -<br>0.59<br>17 | 7.0<br>15 | 0.097<br>92 |

- aki\_stage:**

| factor     | AME    | lower       | upper | p      |
|------------|--------|-------------|-------|--------|
| aki_stage2 | 0.4184 | -<br>0.7419 | 1.579 | 0.4797 |
| aki_stage3 | 12.05  | -3.619      | 27.72 | 0.1317 |

- persistent\_aki\_0\_transient\_aki\_1\_persistent\_aki:**

| factor                                           | AME       | lower           | upper     | p           |
|--------------------------------------------------|-----------|-----------------|-----------|-------------|
| persistent_aki_0_transient_aki_1_persistent_aki1 | 3.2<br>55 | -<br>0.17<br>37 | 6.6<br>84 | 0.06<br>279 |

- persistent\_aki\_stage:**

| factor                | AME   | lower       | upper | p      |
|-----------------------|-------|-------------|-------|--------|
| persistent_aki_stage1 | 1.278 | -<br>0.2937 | 2.849 | 0.111  |
| persistent_aki_stage2 | 5.5   | -6.703      | 17.7  | 0.377  |
| persistent_aki_stage3 | 13.5  | -2.913      | 29.91 | 0.1069 |

- akd\_0\_no\_1\_yes:**

| factor          | AME   | lower      | upper | p      |
|-----------------|-------|------------|-------|--------|
| akd_0_no_1_yes1 | 4.748 | -<br>2.749 | 12.25 | 0.2145 |

Outcome: Hospital length of stay

- aki\_0\_no\_1\_yes:**

| factor          | AME         | lower      | upper | p      |
|-----------------|-------------|------------|-------|--------|
| aki_0_no_1_yes1 | -<br>0.9414 | -<br>4.018 | 2.135 | 0.5486 |

- criterion\_aki\_1\_scr\_2\_diuresis\_3\_both:**

| factor                                        | AME        | low<br>er      | upp<br>er | p          |
|-----------------------------------------------|------------|----------------|-----------|------------|
| criterio_per_aki_1_scr_2_diuresis_3_<br>both2 | 0.61<br>05 | -<br>3.5<br>04 | 4.72<br>5 | 0.77<br>12 |
| criterio_per_aki_1_scr_2_diuresis_3_<br>both3 | 3.19<br>8  | -<br>3.5<br>8  | 9.97<br>5 | 0.35<br>51 |

- **aki\_stage:**

| factor     | AME   | lower      | upper | p       |
|------------|-------|------------|-------|---------|
| aki_stage2 | 1.011 | -<br>3.127 | 5.148 | 0.6322  |
| aki_stage3 | 19.13 | -1.16      | 39.43 | 0.06461 |

- **persistent\_aki\_0\_transient\_aki\_1\_persistent\_aki:**

| factor                                               | AM<br>E   | low<br>er  | up<br>per | p           |
|------------------------------------------------------|-----------|------------|-----------|-------------|
| persistent_aki_0_transient_aki_1_persis<br>tent_aki1 | 7.2<br>01 | 0.50<br>66 | 13.<br>9  | 0.03<br>501 |

- **persistent\_aki\_stage:**

| factor                | AME   | lower      | upper | p      |
|-----------------------|-------|------------|-------|--------|
| persistent_aki_stage1 | 2.889 | -<br>15.32 | 21.09 | 0.7558 |
| persistent_aki_stage2 | 3     | -<br>23.57 | 29.57 | 0.8249 |
| persistent_aki_stage3 | 19.33 | -<br>9.378 | 48.04 | 0.1869 |

- **akd\_0\_no\_1\_yes:**

| factor          | AME   | lower | upper | p      |
|-----------------|-------|-------|-------|--------|
| akd_0_no_1_yes1 | 6.302 | -5.38 | 17.98 | 0.2903 |
