# Supplementary material
Source: MDPI journal article supplement (https://www.mdpi.com/2673-8236/4/2/7)
Supplement: s1 [file s1]

*Association between postoperative kidney events and other postoperative complications*

Outcome: Macce

| Characteristic                                  | N   | OR <sup>1</sup> | 95% CI <sup>1</sup> | p-value      |
|-------------------------------------------------|-----|-----------------|---------------------|--------------|
| aki_0_no_1_yes                                  | 253 |                 |                     |              |
| 0                                               |     | —               | —                   |              |
| 1                                               |     | 2.51            | 1.14, 5.55          | <b>0.021</b> |
| criterion_aki_1_scr_2_diuresis_3_both           | 82  |                 |                     |              |
| 1                                               |     | —               | —                   |              |
| 2                                               |     | 0.40            | 0.11, 1.46          | 0.161        |
| 3                                               |     | 1.06            | 0.19, 5.22          | 0.942        |
| aki_stage                                       | 82  |                 |                     |              |
| 1                                               |     | —               | —                   |              |
| 2                                               |     | 0.84            | 0.17, 3.09          | 0.800        |
| 3                                               |     | 2.23            | 0.10, 25.4          | 0.528        |
| persistent_aki_0_transient_aki_1_persistent_aki | 80  |                 |                     |              |
| 0                                               |     | —               | —                   |              |
| 1                                               |     | 4.14            | 1.05, 15.8          | <b>0.036</b> |
| persistent_aki_stage                            | 14  |                 |                     |              |
| 0                                               |     | —               | —                   |              |
| 1                                               |     | Not applicable  |                     |              |
| 2                                               |     |                 |                     |              |
| 3                                               |     |                 |                     |              |
| akd_0_no_1_yes                                  | 253 |                 |                     |              |
| 0                                               |     | —               | —                   |              |
| 1                                               |     | 8.80            | 1.97, 39.4          | <b>0.003</b> |

<sup>1</sup>OR = Odds Ratio, CI = Confidence Interval

Outcome: Pulmonary complications

| Characteristic | N   | OR <sup>1</sup> | 95% CI <sup>1</sup> | p-value |
|----------------|-----|-----------------|---------------------|---------|
| aki_0_no_1_yes | 254 |                 |                     |         |
| 0              |     | —               | —                   |         |
| 1              |     | 1.11            | 0.64, 1.90          | 0.712   |

| Characteristic                                  | N   | OR <sup>1</sup> | 95% CI <sup>1</sup> | p-value      |
|-------------------------------------------------|-----|-----------------|---------------------|--------------|
| criterion_aki_1_scr_2_diuresis_3_both           | 82  |                 |                     |              |
| 1                                               |     | —               | —                   |              |
| 2                                               |     | 0.93            | 0.34, 2.65          | 0.895        |
| 3                                               |     | 1.30            | 0.29, 5.63          | 0.726        |
| aki_stage                                       | 82  |                 |                     |              |
| 1                                               |     | —               | —                   |              |
| 2                                               |     | 0.54            | 0.16, 1.61          | 0.285        |
| 3                                               |     | Not applicable  |                     |              |
| persistent_aki_0_transient_aki_1_persistent_aki | 80  |                 |                     |              |
| 0                                               |     | —               | —                   |              |
| 1                                               |     | 3.67            | 1.04, 14.9          | <b>0.050</b> |
| persistent_aki_stage                            | 14  |                 |                     |              |
| 0                                               |     | —               | —                   |              |
| 1                                               |     | Not applicable  |                     |              |
| 2                                               |     |                 |                     |              |
| 3                                               |     |                 |                     |              |
| akd_0_no_1_yes                                  | 254 |                 |                     |              |
| 0                                               |     | —               | —                   |              |
| 1                                               |     | 12.6            | 2.19, 237           | <b>0.019</b> |

<sup>1</sup>OR = Odds Ratio, CI = Confidence Interval

#### Outcome: Sepsis

| Characteristic                        | N   | OR <sup>1</sup> | 95% CI <sup>1</sup> | p-value      |
|---------------------------------------|-----|-----------------|---------------------|--------------|
| aki_0_no_1_yes                        | 254 |                 |                     |              |
| 0                                     |     | —               | —                   |              |
| 1                                     |     | 1.20            | 0.60, 2.33          | 0.605        |
| criterion_aki_1_scr_2_diuresis_3_both | 82  |                 |                     |              |
| 1                                     |     | —               | —                   |              |
| 2                                     |     | 2.42            | 0.56, 16.9          | 0.285        |
| 3                                     |     | 8.75            | 1.49, 73.3          | <b>0.023</b> |
| aki_stage                             | 82  |                 |                     |              |

| Characteristic                                  | N   | OR <sup>1</sup> | 95% CI <sup>1</sup> | p-value |
|-------------------------------------------------|-----|-----------------|---------------------|---------|
| 1                                               |     | —               | —                   |         |
| 2                                               |     | 2.02            | 0.55, 6.90          | 0.266   |
| 3                                               |     | 11.3            | 0.99, 260           | 0.057   |
| persistent_aki_0_transient_aki_1_persistent_aki | 80  |                 |                     |         |
| 0                                               |     | —               | —                   |         |
| 1                                               |     | 3.70            | 0.95, 13.9          | 0.051   |
| persistent_aki_stage                            | 14  |                 |                     |         |
| 0                                               |     | —               | —                   |         |
| 1                                               |     |                 | Not applicable      |         |
| 2                                               |     |                 |                     |         |
| 3                                               |     |                 |                     |         |
| akd_0_no_1_yes                                  | 254 |                 |                     |         |
| 0                                               |     | —               | —                   |         |
| 1                                               |     | 2.91            | 0.58, 12.3          | 0.154   |

<sup>1</sup>OR = Odds Ratio, CI = Confidence Interval

#### Outcome: Surgical complications

| Characteristic                                  | N   | OR <sup>1</sup> | 95% CI <sup>1</sup> | p-value |
|-------------------------------------------------|-----|-----------------|---------------------|---------|
| aki_0_no_1_yes                                  | 254 |                 |                     |         |
| 0                                               |     | —               | —                   |         |
| 1                                               |     | 0.56            | 0.23, 1.23          | 0.168   |
| criterion_aki_1_scr_2_diuresis_3_both           | 82  |                 |                     |         |
| 1                                               |     | —               | —                   |         |
| 2                                               |     | 0.61            | 0.12, 3.31          | 0.536   |
| 3                                               |     | 0.67            | 0.03, 6.00          | 0.739   |
| aki_stage                                       | 82  |                 |                     |         |
| 1                                               |     | —               | —                   |         |
| 2                                               |     | 1.29            | 0.17, 6.63          | 0.770   |
| 3                                               |     | 5.50            | 0.23, 68.6          | 0.193   |
| persistent_aki_0_transient_aki_1_persistent_aki | 80  |                 |                     |         |
| 0                                               |     | —               | —                   |         |

| Characteristic       | N   | OR <sup>1</sup> | 95% CI <sup>1</sup> | p-value |
|----------------------|-----|-----------------|---------------------|---------|
| 1                    |     | 2.07            | 0.28, 10.5          | 0.412   |
| persistent_aki_stage | 14  |                 |                     |         |
| 0                    |     | —               | —                   |         |
| 1                    |     | Non stimabile   |                     |         |
| 2                    |     |                 |                     |         |
| 3                    |     |                 |                     |         |
| akd_0_no_1_yes       | 254 |                 |                     |         |
| 0                    |     | —               | —                   |         |
| 1                    |     | 2.08            | 0.30, 9.45          | 0.382   |

<sup>1</sup>OR = Odds Ratio, CI = Confidence Interval
