# Supplementary material
Source: MDPI journal article supplement (https://www.mdpi.com/2673-8236/4/2/7)
Supplement: s1 [file s1]

Secondary outcomes stratified per AKI

| Characteristic                                  | N   | Overall, N = 254 <sup>1</sup> | 0, N = 172 <sup>1</sup> | 1, N = 82 <sup>1</sup> | q-value <sup>3</sup> |
|-------------------------------------------------|-----|-------------------------------|-------------------------|------------------------|----------------------|
| persistent_aki_0_transient_aki_1_persistent_aki | 80  |                               |                         |                        | >0.9                 |
| 0                                               |     | 68 (85%)                      | 0 (NA%)                 | 68 (85%)               |                      |
| 1                                               |     | 12 (15%)                      | 0 (NA%)                 | 12 (15%)               |                      |
| persistent_aki_stage                            | 14  |                               |                         |                        | >0.9                 |
| 0                                               |     | 1 (7.1%)                      | 0 (NA%)                 | 1 (7.1%)               |                      |
| 1                                               |     | 9 (64%)                       | 0 (NA%)                 | 9 (64%)                |                      |
| 2                                               |     | 1 (7.1%)                      | 0 (NA%)                 | 1 (7.1%)               |                      |
| 3                                               |     | 3 (21%)                       | 0 (NA%)                 | 3 (21%)                |                      |
| rrt_0_no_1_yes                                  | 254 |                               |                         |                        | >0.9                 |
| 0                                               |     | 252 (99%)                     | 172 (100%)              | 80 (98%)               |                      |
| 1                                               |     | 2 (0.8%)                      | 0 (0%)                  | 2 (2.4%)               |                      |
| rrt_days                                        | 2   |                               |                         |                        | >0.9                 |
| 8                                               |     | 1 (50%)                       | 0 (NA%)                 | 1 (50%)                |                      |
| 9                                               |     | 1 (50%)                       | 0 (NA%)                 | 1 (50%)                |                      |
| akd_0_no_1_yes                                  | 254 |                               |                         |                        | 0.002                |
| 0                                               |     | 246 (97%)                     | 172 (100%)              | 74 (90%)               |                      |
| 1                                               |     | 8 (3.1%)                      | 0 (0%)                  | 8 (9.8%)               |                      |
| akd_stage                                       | 8   |                               |                         |                        | >0.9                 |
| 1                                               |     | 3 (38%)                       | 0 (NA%)                 | 3 (38%)                |                      |
| 2                                               |     | 3 (38%)                       | 0 (NA%)                 | 3 (38%)                |                      |
| 3                                               |     | 2 (25%)                       | 0 (NA%)                 | 2 (25%)                |                      |

| Characteristic                   | N   | Overall, N = 254 <sup>1</sup> | 0, N = 172 <sup>1</sup> | 1, N = 82 <sup>1</sup> | q-value <sup>3</sup> |
|----------------------------------|-----|-------------------------------|-------------------------|------------------------|----------------------|
| icu_los_days                     | 254 | 1.00 (1.00, 2.00)             | 1.00 (1.00, 2.00)       | 2.00 (1.00, 3.00)      | >0.9                 |
| icu_death_0_no_1_yes             | 254 |                               |                         |                        | >0.9                 |
| 0                                |     | 253 (100%)                    | 172 (100%)              | 81 (99%)               |                      |
| 1                                |     | 1 (0.4%)                      | 0 (0%)                  | 1 (1.2%)               |                      |
| h_los_days                       | 254 | 12 (10, 14)                   | 11 (10, 14)             | 12 (10, 15)            | >0.9                 |
| h_death_0_no_1_yes               | 254 |                               |                         |                        | >0.9                 |
| 0                                |     | 252 (99%)                     | 171 (99%)               | 81 (99%)               |                      |
| 1                                |     | 2 (0.8%)                      | 1 (0.6%)                | 1 (1.2%)               |                      |
| readmission_0_no_1_yes           | 249 |                               |                         |                        | >0.9                 |
| 0                                |     | 243 (98%)                     | 165 (97%)               | 78 (99%)               |                      |
| 1                                |     | 6 (2.4%)                      | 5 (2.9%)                | 1 (1.3%)               |                      |
| ckd_0_no_1_yes                   | 52  |                               |                         |                        | >0.9                 |
| 0                                |     | 50 (96%)                      | 36 (100%)               | 14 (88%)               |                      |
| 1                                |     | 2 (3.8%)                      | 0 (0%)                  | 2 (12%)                |                      |
| ckd_stage                        | 2   |                               |                         |                        | >0.9                 |
| 1                                |     | 1 (50%)                       | 0 (NA%)                 | 1 (50%)                |                      |
| 2                                |     | 1 (50%)                       | 0 (NA%)                 | 1 (50%)                |                      |
| macce_within_30_days_0_no_1_yes  | 253 |                               |                         |                        | 0.3                  |
| 0                                |     | 224 (89%)                     | 157 (92%)               | 67 (82%)               |                      |
| 1                                |     | 29 (11%)                      | 14 (8.2%)               | 15 (18%)               |                      |
| surgical_complication_0_no_1_yes | 254 |                               |                         |                        | >0.9                 |
| 0                                |     | 218 (86%)                     | 144 (84%)               | 74 (90%)               |                      |
| 1                                |     | 36 (14%)                      | 28 (16%)                | 8 (9.8%)               |                      |

| Characteristic                                    | N   | Overall, N = 254 <sup>1</sup> | 0, N = 172 <sup>1</sup> | 1, N = 82 <sup>1</sup> | q-value <sup>3</sup> |
|---------------------------------------------------|-----|-------------------------------|-------------------------|------------------------|----------------------|
| second_surgery_0_no_1_yes                         | 254 |                               |                         |                        | >0.9                 |
| 0                                                 |     | 239 (94%)                     | 159 (92%)               | 80 (98%)               |                      |
| 1                                                 |     | 15 (5.9%)                     | 13 (7.6%)               | 2 (2.4%)               |                      |
| cmv_time_h                                        | 244 | 0.0 (0.0, 3.2)                | 0.0 (0.0, 2.0)          | 0.0 (0.0, 4.0)         | >0.9                 |
| pulmonary_complications_within_30_days_0_no_1_yes | 254 |                               |                         |                        | >0.9                 |
| 0                                                 |     | 159 (63%)                     | 109 (63%)               | 50 (61%)               |                      |
| 1                                                 |     | 95 (37%)                      | 63 (37%)                | 32 (39%)               |                      |
| sepsis_0_no_1_yes                                 | 254 |                               |                         |                        | >0.9                 |
| 0                                                 |     | 209 (82%)                     | 143 (83%)               | 66 (80%)               |                      |
| 1                                                 |     | 45 (18%)                      | 29 (17%)                | 16 (20%)               |                      |
