# Supplementary material
Source: MDPI journal article supplement (https://www.mdpi.com/2673-8236/4/2/7)
Supplement: s1 [file s1]

Baseline perioperative characteristics stratified according AKI

| Characteristic                                                     | N           | Over<br>all, N<br>= 254 <sup>1</sup> | 0, N<br>= 172 <sup>1</sup>  | 1, N<br>= 82 <sup>1</sup>   |
|--------------------------------------------------------------------|-------------|--------------------------------------|-----------------------------|-----------------------------|
| age                                                                | 2<br>5<br>4 | 66<br>(56,<br>72)                    | 65<br>(56,<br>71)           | 66<br>(58,<br>73)           |
| gender_1_male_2_female                                             | 2<br>5<br>4 |                                      |                             |                             |
| 1                                                                  |             | 206<br>(81%<br>)                     | 140<br>(81<br>%)            | 66<br>(80<br>%)             |
| 2                                                                  |             | 48<br>(19%<br>)                      | 32<br>(19<br>%)             | 16<br>(20<br>%)             |
| bmi                                                                | 2<br>5<br>4 | 24.3<br>(22.4<br>,<br>27.7)          | 24.0<br>(22.<br>0,<br>26.9) | 26.2<br>(23.<br>1,<br>29.4) |
| dependency_0_independent_1_partially_dependent_2_totally_dependent | 2<br>5<br>4 |                                      |                             |                             |
| 0                                                                  |             | 247<br>(97%<br>)                     | 168<br>(98<br>%)            | 79<br>(96<br>%)             |
| 1                                                                  |             | 7<br>(2.8<br>%)                      | 4<br>(2.3<br>%)             | 3<br>(3.7<br>%)             |
| asa_status                                                         | 2<br>5<br>4 |                                      |                             |                             |
| 1                                                                  |             | 1<br>(0.4<br>%)                      | 1<br>(0.6<br>%)             | 0<br>(0%)                   |
| 2                                                                  |             | 144<br>(57%<br>)                     | 105<br>(61<br>%)            | 39<br>(48<br>%)             |
| 3                                                                  |             | 106<br>(42%<br>)                     | 64<br>(37<br>%)             | 42<br>(51<br>%)             |
| 4                                                                  |             | 3<br>(1.2<br>%)                      | 2<br>(1.2<br>%)             | 1<br>(1.2<br>%)             |
| chronic_steroid_0_no_1_yes                                         | 2<br>5<br>4 |                                      |                             |                             |
| 0                                                                  |             | 242<br>(95%<br>)                     | 164<br>(95<br>%)            | 78<br>(95<br>%)             |
| 1                                                                  |             | 12<br>(4.7<br>%)                     | 8<br>(4.7<br>%)             | 4<br>(4.9<br>%)             |

| Characteristic                                               | N           | Over<br>all, N<br>= 254 <sup>1</sup> | 0, N<br>= 172 <sup>1</sup> | 1, N<br>= 82 <sup>1</sup> |
|--------------------------------------------------------------|-------------|--------------------------------------|----------------------------|---------------------------|
| diabetes_mellitus_0_no_1_yes                                 | 2<br>5<br>4 |                                      |                            |                           |
| 0                                                            |             | 209<br>(82%<br>)                     | 145<br>(84<br>%)           | 64<br>(78<br>%)           |
| 1                                                            |             | 45<br>(18%<br>)                      | 27<br>(16<br>%)            | 18<br>(22<br>%)           |
| hypertension_0_no_1_yes                                      | 2<br>5<br>4 |                                      |                            |                           |
| 0                                                            |             | 153<br>(60%<br>)                     | 112<br>(65<br>%)           | 41<br>(50<br>%)           |
| 1                                                            |             | 101<br>(40%<br>)                     | 60<br>(35<br>%)            | 41<br>(50<br>%)           |
| congestive_heart_failure_in_30_days_prior_surgery_0_no_1_yes | 2<br>5<br>4 |                                      |                            |                           |
| 0                                                            |             | 253<br>(100<br>%)                    | 172<br>(100<br>%)          | 81<br>(99<br>%)           |
| 1                                                            |             | 1<br>(0.4<br>%)                      | 0<br>(0%)                  | 1<br>(1.2<br>%)           |
| preoperative_dyspnea_0_no_1_yes                              | 2<br>5<br>4 |                                      |                            |                           |
| 0                                                            |             | 248<br>(98%<br>)                     | 168<br>(98<br>%)           | 80<br>(98<br>%)           |
| 1                                                            |             | 6<br>(2.4<br>%)                      | 4<br>(2.3<br>%)            | 2<br>(2.4<br>%)           |
| current_smoker_within_1_y_0_no_1_yes                         | 2<br>5<br>4 |                                      |                            |                           |
| 0                                                            |             | 206<br>(81%<br>)                     | 133<br>(77<br>%)           | 73<br>(89<br>%)           |
| 1                                                            |             | 48<br>(19%<br>)                      | 39<br>(23<br>%)            | 9<br>(11<br>%)            |
| severe_copd_0_no_1_yes                                       | 2<br>5<br>4 |                                      |                            |                           |
| 0                                                            |             | 226<br>(89%<br>)                     | 156<br>(91<br>%)           | 70<br>(85<br>%)           |

| Characteristic                                                                                                                   | N           | Overall, N = 254 <sup>1</sup> | 0, N = 172 <sup>1</sup>      | 1, N = 82 <sup>1</sup>        |
|----------------------------------------------------------------------------------------------------------------------------------|-------------|-------------------------------|------------------------------|-------------------------------|
| 1                                                                                                                                |             | 28<br>(11%)                   | 16<br>(9.3%)                 | 12<br>(15%)                   |
| nsqip                                                                                                                            | 2<br>5<br>4 | 9.00<br>(8.00<br>,<br>11.50)  | 9.00<br>(8.00<br>,<br>11.50) | 10.50<br>(8.00<br>,<br>11.50) |
| hematological_cancer_0_no_1_yes                                                                                                  | 2<br>5<br>4 |                               |                              |                               |
| 0                                                                                                                                |             | 248<br>(98%)                  | 169<br>(98%)                 | 79<br>(96%)                   |
| 1                                                                                                                                |             | 6<br>(2.4%)                   | 3<br>(1.7%)                  | 3<br>(3.7%)                   |
| alohol_use_0_no_1_yes                                                                                                            | 2<br>5<br>4 |                               |                              |                               |
| 0                                                                                                                                |             | 244<br>(96%)                  | 166<br>(97%)                 | 78<br>(95%)                   |
| 1                                                                                                                                |             | 10<br>(3.9%)                  | 6<br>(3.5%)                  | 4<br>(4.9%)                   |
| dementia_0_no_1_yes                                                                                                              | 2<br>5<br>4 |                               |                              |                               |
| 0                                                                                                                                |             | 247<br>(97%)                  | 168<br>(98%)                 | 79<br>(96%)                   |
| 1                                                                                                                                |             | 7<br>(2.8%)                   | 4<br>(2.3%)                  | 3<br>(3.7%)                   |
| ischemic_heart_disease_history_of_mi_positive_exercise_test_current_chest_pain_use_of_nitrate_or_e<br>cg_with_q_waves_0_no_1_yes | 2<br>5<br>4 |                               |                              |                               |
| 0                                                                                                                                |             | 225<br>(89%)                  | 153<br>(89%)                 | 72<br>(88%)                   |
| 1                                                                                                                                |             | 29<br>(11%)                   | 19<br>(11%)                  | 10<br>(12%)                   |
| cardiovascular_disease_prior_stroke_or_tia_5years_0_no_1_yes                                                                     | 2<br>5<br>4 |                               |                              |                               |
| 0                                                                                                                                |             | 250<br>(98%)                  | 171<br>(99%)                 | 79<br>(96%)                   |
| 1                                                                                                                                |             | 4<br>(1.6%)                   | 1<br>(0.6%)                  | 3<br>(3.7%)                   |

| Characteristic           | N   | Overall, N = 254 <sup>1</sup> | 0, N = 172 <sup>1</sup> | 1, N = 82 <sup>1</sup> |
|--------------------------|-----|-------------------------------|-------------------------|------------------------|
| statins_0_no_1_yes       | 254 |                               |                         |                        |
| 0                        |     | 208<br>(82%)                  | 142<br>(83%)            | 66<br>(80%)            |
| 1                        |     | 46<br>(18%)                   | 30<br>(17%)             | 16<br>(20%)            |
| ace_i_0_no_1_yes         | 254 |                               |                         |                        |
| 0                        |     | 208<br>(82%)                  | 146<br>(85%)            | 62<br>(76%)            |
| 1                        |     | 46<br>(18%)                   | 26<br>(15%)             | 20<br>(24%)            |
| arb_0_no_1_yes           | 254 |                               |                         |                        |
| 0                        |     | 223<br>(88%)                  | 156<br>(91%)            | 67<br>(82%)            |
| 1                        |     | 31<br>(12%)                   | 16<br>(9.3%)            | 15<br>(18%)            |
| beta_blockers_0_no_1_yes | 254 |                               |                         |                        |
| 0                        |     | 204<br>(80%)                  | 137<br>(80%)            | 67<br>(82%)            |
| 1                        |     | 50<br>(20%)                   | 35<br>(20%)             | 15<br>(18%)            |
| insulin_0_no_1_yes       | 254 |                               |                         |                        |
| 0                        |     | 245<br>(96%)                  | 166<br>(97%)            | 79<br>(96%)            |
| 1                        |     | 9<br>(3.5%)                   | 6<br>(3.5%)             | 3<br>(3.7%)            |
| ppi_0_no_1_yes           | 254 |                               |                         |                        |
| 0                        |     | 116<br>(46%)                  | 84<br>(49%)             | 32<br>(39%)            |

| Characteristic                 | N           | Overall, N = 254 <sup>1</sup>          | 0, N = 172 <sup>1</sup>                | 1, N = 82 <sup>1</sup>                 |
|--------------------------------|-------------|----------------------------------------|----------------------------------------|----------------------------------------|
| 1                              |             | 138<br>(54%)                           | 88<br>(51%)                            | 50<br>(61%)                            |
| nsai_ds_0_no_1_yes             | 2<br>5<br>4 |                                        |                                        |                                        |
| 0                              |             | 219<br>(86%)                           | 151<br>(88%)                           | 68<br>(83%)                            |
| 1                              |             | 35<br>(14%)                            | 21<br>(12%)                            | 14<br>(17%)                            |
| baseline_serum_creatinine      | 2<br>5<br>4 | 77<br>(67,<br>87)                      | 77<br>(66,<br>87)                      | 78<br>(69,<br>92)                      |
| preoperative_urea              | 2<br>3<br>0 | 5.55<br>(4.31<br>,<br>7.00)            | 5.60<br>(4.3<br>6,<br>6.88)            | 5.50<br>(4.0<br>7,<br>7.53)            |
| e_gfr                          | 2<br>5<br>4 | 90<br>(79,<br>100)                     | 92<br>(81,<br>101)                     | 88<br>(72,<br>98)                      |
| preop_hemoglobin               | 2<br>4<br>8 | 12.9<br>0<br>(11.7<br>0,<br>13.8<br>0) | 12.8<br>0<br>(11.<br>70,<br>13.8<br>0) | 12.9<br>0<br>(11.<br>80,<br>13.7<br>0) |
| preop_wbc                      | 2<br>1<br>0 | 5.71<br>(4.48<br>,<br>7.30)            | 5.66<br>(4.5<br>0,<br>6.98)            | 6.03<br>(4.4<br>6,<br>7.60)            |
| preop_platelets                | 2<br>4<br>4 | 207<br>(165,<br>252)                   | 205<br>(168<br>,<br>247)               | 216<br>(164<br>,<br>258)               |
| atrial_fibrillation_0_no_1_yes | 2<br>5<br>4 |                                        |                                        |                                        |
| 0                              |             | 244<br>(96%)                           | 166<br>(97%)                           | 78<br>(95%)                            |
| 1                              |             | 10<br>(3.9%)                           | 6<br>(3.5%)                            | 4<br>(4.9%)                            |
| fe_45_percent_0_no_1_yes       | 2<br>5<br>4 |                                        |                                        |                                        |
| 0                              |             | 247<br>(97%)                           | 168<br>(98%)                           | 79<br>(96%)                            |

| Characteristic                                                                | N           | Over<br>all, N<br>= 254 <sup>1</sup> | 0, N<br>= 172 <sup>1</sup>      | 1, N<br>= 82 <sup>1</sup>       |
|-------------------------------------------------------------------------------|-------------|--------------------------------------|---------------------------------|---------------------------------|
| 1                                                                             |             | 7<br>(2.8<br>%)                      | 4<br>(2.3<br>%)                 | 3<br>(3.7<br>%)                 |
| carotid_stenosis_0_no_1_yes                                                   | 2<br>5<br>4 |                                      |                                 |                                 |
| 0                                                                             |             | 232<br>(91%<br>)                     | 156<br>(91<br>%)                | 76<br>(93<br>%)                 |
| 1                                                                             |             | 22<br>(8.7<br>%)                     | 16<br>(9.3<br>%)                | 6<br>(7.3<br>%)                 |
| mini_invasive_surgery_2_mini_invasive_3_partially_invasive_4_totally_invasive | 2<br>5<br>4 |                                      |                                 |                                 |
| 2                                                                             |             | 39<br>(15%<br>)                      | 33<br>(19<br>%)                 | 6<br>(7.3<br>%)                 |
| 3                                                                             |             | 9<br>(3.5<br>%)                      | 4<br>(2.3<br>%)                 | 5<br>(6.1<br>%)                 |
| 4                                                                             |             | 206<br>(81%<br>)                     | 135<br>(78<br>%)                | 71<br>(87<br>%)                 |
| tri_incisional_surgery_0_no_1_yes                                             | 2<br>5<br>4 |                                      |                                 |                                 |
| 0                                                                             |             | 241<br>(95%<br>)                     | 161<br>(94<br>%)                | 80<br>(98<br>%)                 |
| 1                                                                             |             | 13<br>(5.1<br>%)                     | 11<br>(6.4<br>%)                | 2<br>(2.4<br>%)                 |
| type_of_anesthesia_1_inhaled_2_tiva_3_epidural_inhaled_4_peidural_tiva        | 2<br>4<br>8 |                                      |                                 |                                 |
| 1                                                                             |             | 2<br>(0.8<br>%)                      | 0<br>(0%)                       | 2<br>(2.5<br>%)                 |
| 2                                                                             |             | 23<br>(9.3<br>%)                     | 16<br>(9.5<br>%)                | 7<br>(8.9<br>%)                 |
| 3                                                                             |             | 18<br>(7.3<br>%)                     | 9<br>(5.3<br>%)                 | 9<br>(11<br>%)                  |
| 4                                                                             |             | 205<br>(83%<br>)                     | 144<br>(85<br>%)                | 61<br>(77<br>%)                 |
| anesthesia_duration_h                                                         | 2<br>5<br>1 | 6.00<br>(5.20<br>7.20)               | 6.00<br>(5.2<br>0,<br>7.20<br>) | 6.05<br>(5.9<br>5,<br>7.00<br>) |

| Characteristic                           | N           | Over<br>all, N<br>= 254 <sup>1</sup> | 0, N<br>= 172 <sup>1</sup> | 1, N<br>= 82 <sup>1</sup> |
|------------------------------------------|-------------|--------------------------------------|----------------------------|---------------------------|
| intraop_lidocaine_0_no_1_yes             | 2<br>4<br>8 |                                      |                            |                           |
| 0                                        |             | 232<br>(94%)                         | 156<br>(92%)               | 76<br>(96%)               |
| 1                                        |             | 16<br>(6.5%)                         | 13<br>(7.7%)               | 3<br>(3.8%)               |
| intraop_magnesium_0_no_1_yes             | 2<br>4<br>8 |                                      |                            |                           |
| 0                                        |             | 190<br>(77%)                         | 130<br>(77%)               | 60<br>(76%)               |
| 1                                        |             | 58<br>(23%)                          | 39<br>(23%)                | 19<br>(24%)               |
| intraop_dexamethasone_0_no_1_yes         | 2<br>4<br>8 |                                      |                            |                           |
| 0                                        |             | 76<br>(31%)                          | 53<br>(31%)                | 23<br>(29%)               |
| 1                                        |             | 172<br>(69%)                         | 116<br>(69%)               | 56<br>(71%)               |
| intraop_ranitidine_0_no_1_yes            | 2<br>4<br>8 |                                      |                            |                           |
| 0                                        |             | 120<br>(48%)                         | 77<br>(46%)                | 43<br>(54%)               |
| 1                                        |             | 128<br>(52%)                         | 92<br>(54%)                | 36<br>(46%)               |
| intraop_ppi_0_no_1_yes                   | 2<br>4<br>7 |                                      |                            |                           |
| 0                                        |             | 129<br>(52%)                         | 92<br>(55%)                | 37<br>(47%)               |
| 1                                        |             | 118<br>(48%)                         | 76<br>(45%)                | 42<br>(53%)               |
| intraop_nmb_1_rocuronium_2_cisatracurium | 2<br>4<br>5 |                                      |                            |                           |
| 1                                        |             | 238<br>(97%)                         | 162<br>(98%)               | 76<br>(96%)               |

| Characteristic                                            | N           | Over<br>all, N<br>= 254 <sup>1</sup>   | 0, N<br>= 172 <sup>1</sup>             | 1, N<br>= 82 <sup>1</sup>              |
|-----------------------------------------------------------|-------------|----------------------------------------|----------------------------------------|----------------------------------------|
| 2                                                         |             | 7<br>(2.9<br>%)                        | 4<br>(2.4<br>%)                        | 3<br>(3.8<br>%)                        |
| intraop_reversal_0_no_reversal_1_neostigmine_2_sugammadex | 2<br>4<br>3 |                                        |                                        |                                        |
| 0                                                         |             | 117<br>(48%<br>)                       | 76<br>(46<br>%)                        | 41<br>(53<br>%)                        |
| 1                                                         |             | 21<br>(8.6<br>%)                       | 14<br>(8.4<br>%)                       | 7<br>(9.1<br>%)                        |
| 2                                                         |             | 105<br>(43%<br>)                       | 76<br>(46<br>%)                        | 29<br>(38<br>%)                        |
| intraop_min_sp_o2_fi_o2                                   | 2<br>4<br>8 | 120<br>(98,<br>155)                    | 120<br>(96,<br>158)                    | 120<br>(107<br>,<br>155)               |
| intraop_min_sbp_mm_hg                                     | 2<br>4<br>7 | 100<br>(90,<br>100)                    | 100<br>(90,<br>100)                    | 100<br>(90,<br>110)                    |
| intraop_volume_ml                                         | 2<br>4<br>7 | 4,00<br>0<br>(3,50<br>0,<br>5,00<br>0) | 4,00<br>0<br>(3,5<br>00,<br>5,00<br>0) | 4,00<br>0<br>(3,5<br>00,<br>5,00<br>0) |
| intraop_colloid_0_no_1_yes                                | 2<br>4<br>7 |                                        |                                        |                                        |
| 0                                                         |             | 233<br>(94%<br>)                       | 159<br>(95<br>%)                       | 74<br>(94<br>%)                        |
| 1                                                         |             | 14<br>(5.7<br>%)                       | 9<br>(5.4<br>%)                        | 5<br>(6.3<br>%)                        |
| intraop_blood_loss_ml                                     | 2<br>4<br>6 | 150<br>(100,<br>200)                   | 100<br>(100<br>,<br>200)               | 200<br>(100<br>,<br>215)               |
| intraop_blood_transfusions_0_no_1_yes                     | 2<br>4<br>7 |                                        |                                        |                                        |
| 0                                                         |             | 233<br>(94%<br>)                       | 161<br>(96<br>%)                       | 72<br>(91<br>%)                        |
| 1                                                         |             | 14<br>(5.7<br>%)                       | 7<br>(4.2<br>%)                        | 7<br>(8.9<br>%)                        |
| volume_infused_ml_kg_h                                    | 2<br>4<br>7 | 9.26<br>(7.68<br>,<br>10.7<br>2)       | 9.50<br>(7.6<br>7,<br>11.1<br>3)       | 8.70<br>(7.7<br>4,<br>10.1<br>5)       |



| Characteristic                  | N           | Overall, N = 254 <sup>1</sup>          | 0, N = 172 <sup>1</sup>                | 1, N = 82 <sup>1</sup>                 |
|---------------------------------|-------------|----------------------------------------|----------------------------------------|----------------------------------------|
| hb_end_surgery                  | 2<br>4<br>1 | 12.0<br>0<br>(11.0<br>0,<br>13.1<br>0) | 12.0<br>0<br>(11.<br>10,<br>13.2<br>0) | 12.0<br>0<br>(10.<br>90,<br>12.8<br>0) |
| lactates_end_surgery            | 7<br>4      | 1.16<br>(0.99<br>,<br>1.78)            | 1.10<br>(0.8<br>8,<br>2.03<br>)        | 1.25<br>(1.0<br>6,<br>1.65<br>)        |
| intraop_vasopressors_0_no_1_yes | 2<br>4<br>7 |                                        |                                        |                                        |
| 0                               |             | 231<br>(94%<br>)                       | 158<br>(94<br>%)                       | 73<br>(92<br>%)                        |
| 1                               |             | 16<br>(6.5<br>%)                       | 10<br>(6.0<br>%)                       | 6<br>(7.6<br>%)                        |
| vasopressor_max_dose            | 1<br>6      |                                        |                                        |                                        |
| 0.05                            |             | 3<br>(19%<br>)                         | 1<br>(10<br>%)                         | 2<br>(33<br>%)                         |
| 0.08                            |             | 1<br>(6.2<br>%)                        | 1<br>(10<br>%)                         | 0<br>(0%)                              |
| 0.1                             |             | 4<br>(25%<br>)                         | 2<br>(20<br>%)                         | 2<br>(33<br>%)                         |
| 0.2                             |             | 5<br>(31%<br>)                         | 4<br>(40<br>%)                         | 1<br>(17<br>%)                         |
| 0.3                             |             | 3<br>(19%<br>)                         | 2<br>(20<br>%)                         | 1<br>(17<br>%)                         |
| intraop_inotropes_0_no_1_yes    | 2<br>4<br>7 |                                        |                                        |                                        |
| 0                               |             | 230<br>(93%<br>)                       | 157<br>(93<br>%)                       | 73<br>(92<br>%)                        |
| 1                               |             | 17<br>(6.9<br>%)                       | 11<br>(6.5<br>%)                       | 6<br>(7.6<br>%)                        |
| inotrope_max_dose               | 1<br>7      |                                        |                                        |                                        |
| 3                               |             | 7<br>(41%<br>)                         | 5<br>(45<br>%)                         | 2<br>(33<br>%)                         |
| 4                               |             | 1<br>(5.9<br>%)                        | 0<br>(0%)                              | 1<br>(17<br>%)                         |

| Characteristic                | N           | Over<br>all, N<br>= 254 <sup>1</sup> | 0, N<br>= 172 <sup>1</sup> | 1, N<br>= 82 <sup>1</sup>       |
|-------------------------------|-------------|--------------------------------------|----------------------------|---------------------------------|
| 5                             |             | 8<br>(47%<br>)                       | 5<br>(45<br>%)             | 3<br>(50<br>%)                  |
| 6                             |             | 1<br>(5.9<br>%)                      | 1<br>(9.1<br>%)            | 0<br>(0%)                       |
| intraop_arrhythmia_0_no_1_yes | 2<br>4<br>8 |                                      |                            |                                 |
| 0                             |             | 242<br>(98%<br>)                     | 166<br>(98<br>%)           | 76<br>(96<br>%)                 |
| 1                             |             | 6<br>(2.4<br>%)                      | 3<br>(1.8<br>%)            | 3<br>(3.8<br>%)                 |
| diuresis_end_of_surgery_ml    | 2<br>4<br>6 | 500<br>(322,<br>750)                 | 500<br>(340<br>,<br>770)   | 500<br>(315<br>,<br>700)        |
| diuresis_endsurgery_ml_kg_h   | 2<br>4<br>6 | 1.14<br>(0.76<br>,<br>1.75)          | 1.20<br>(0.8<br>,<br>1.77) | 1.01<br>(0.6<br>3,<br>1.65<br>) |
| intraop_diuretics_0_no_1_yes  | 2<br>4<br>8 |                                      |                            |                                 |
| 0                             |             | 223<br>(90%<br>)                     | 154<br>(91<br>%)           | 69<br>(87<br>%)                 |
| 1                             |             | 25<br>(10%<br>)                      | 15<br>(8.9<br>%)           | 10<br>(13<br>%)                 |
| intraop_nsai_ds_0_no_1_yes    | 2<br>4<br>8 |                                      |                            |                                 |
| 0                             |             | 129<br>(52%<br>)                     | 95<br>(56<br>%)            | 34<br>(43<br>%)                 |
| 1                             |             | 119<br>(48%<br>)                     | 74<br>(44<br>%)            | 45<br>(57<br>%)                 |
| monitor_in_pacu_0_no_1_yes    | 2<br>5<br>4 |                                      |                            |                                 |
| 0                             |             | 196<br>(77%<br>)                     | 130<br>(76<br>%)           | 66<br>(80<br>%)                 |
| 1                             |             | 58<br>(23%<br>)                      | 42<br>(24<br>%)            | 16<br>(20<br>%)                 |
| monitor_in_icu_0_no_1_yes     | 2<br>5<br>4 |                                      |                            |                                 |

| Characteristic                           | N           | Over<br>all, N<br>= 254 <sup>1</sup> | 0, N<br>= 172 <sup>1</sup> | 1, N<br>= 82 <sup>1</sup> |
|------------------------------------------|-------------|--------------------------------------|----------------------------|---------------------------|
| 0                                        |             | 59<br>(23%<br>)                      | 43<br>(25%<br>)            | 16<br>(20%<br>)           |
| 1                                        |             | 195<br>(77%<br>)                     | 129<br>(75%<br>)           | 66<br>(80%<br>)           |
| extubation_at_end_of_surgery_0_no_1_yes  | 2<br>5<br>3 |                                      |                            |                           |
| 0                                        |             | 117<br>(46%<br>)                     | 80<br>(47%<br>)            | 37<br>(46%<br>)           |
| 1                                        |             | 136<br>(54%<br>)                     | 92<br>(53%<br>)            | 44<br>(54%<br>)           |
| intraop_aki_0_no_1_yes                   | 2<br>4<br>6 |                                      |                            |                           |
| 0                                        |             | 219<br>(89%<br>)                     | 153<br>(92%<br>)           | 66<br>(84%<br>)           |
| 1                                        |             | 27<br>(11%<br>)                      | 14<br>(8.4%<br>)           | 13<br>(16%<br>)           |
| criterio_per_aki_1_scr_2_diuresis_3_both | 8<br>2      |                                      |                            |                           |
| 1                                        |             | 23<br>(28%<br>)                      | 0<br>(NA%<br>)             | 23<br>(28%<br>)           |
| 2                                        |             | 48<br>(59%<br>)                      | 0<br>(NA%<br>)             | 48<br>(59%<br>)           |
| 3                                        |             | 11<br>(13%<br>)                      | 0<br>(NA%<br>)             | 11<br>(13%<br>)           |
| aki_stage                                | 8<br>2      |                                      |                            |                           |
| 1                                        |             | 60<br>(73%<br>)                      | 0<br>(NA%<br>)             | 60<br>(73%<br>)           |
| 2                                        |             | 19<br>(23%<br>)                      | 0<br>(NA%<br>)             | 19<br>(23%<br>)           |
| 3                                        |             | 3<br>(3.7%<br>)                      | 0<br>(NA%<br>)             | 3<br>(3.7%<br>)           |

<sup>1</sup>Median (IQR); n (%)
