# Supplementary material
Source: MDPI journal article supplement (https://www.mdpi.com/2673-8236/4/2/7)
Supplement: s1 [file s1]

Univariate logistic regression models for AKI

| Characteristic                                                     | N           | OR <sup>1</sup> | 95 %<br>CI <sup>1</sup> | p-<br>valu<br>e       |
|--------------------------------------------------------------------|-------------|-----------------|-------------------------|-----------------------|
| age                                                                | 2<br>5<br>4 | 1.02            | 1.0<br>0,<br>1.0<br>5   | 0.09<br>1             |
| gender_1_male_2_female                                             | 2<br>5<br>4 |                 |                         |                       |
| 1                                                                  |             | —               | —                       |                       |
| 2                                                                  |             | 1.06            | 0.5<br>3,<br>2.0<br>4   | 0.86<br>3             |
| bmi                                                                | 2<br>5<br>4 | 1.12            | 1.0<br>5,<br>1.2<br>0   | <b>&lt;0.0<br/>01</b> |
| dependency_0_independent_1_partially_dependent_2_totally_dependent | 2<br>5<br>4 |                 |                         |                       |
| 0                                                                  |             | —               | —                       |                       |
| 1                                                                  |             | 1.59            | 0.3<br>1,<br>7.4<br>0   | 0.54<br>7             |
| asa_status                                                         | 2<br>5<br>4 |                 |                         |                       |
| 1                                                                  |             | —               | —                       |                       |
| 2                                                                  |             | 786,75<br>3     | 0.0<br>0,<br>NA         | 0.98<br>8             |
| 3                                                                  |             | 1,390,<br>056   | 0.0<br>0,<br>NA         | 0.98<br>7             |
| 4                                                                  |             | 1,059,<br>090   | 0.0<br>0,<br>NA         | 0.98<br>7             |
| chronic_steroid_0_no_1_yes                                         | 2<br>5<br>4 |                 |                         |                       |
| 0                                                                  |             | —               | —                       |                       |
| 1                                                                  |             | 1.05            | 0.2<br>7,<br>3.4<br>4   | 0.93<br>6             |
| diabetes_mellitus_0_no_1_yes                                       | 2<br>5<br>4 |                 |                         |                       |
| 0                                                                  |             | —               | —                       |                       |

| Characteristic                                               | N   | OR <sup>1</sup> | 95 %<br>CI <sup>1</sup> | p-<br>valu<br>e |
|--------------------------------------------------------------|-----|-----------------|-------------------------|-----------------|
| 1                                                            |     | 1.51            | 0.77, 2.92              | 0.224           |
| hypertension_0_no_1_yes                                      | 254 |                 |                         |                 |
| 0                                                            |     | —               | —                       |                 |
| 1                                                            |     | 1.87            | 1.09, 3.19              | <b>0.022</b>    |
| congestive_heart_failure_in_30_days_prior_surgery_0_no_1_yes | 254 |                 |                         |                 |
| 0                                                            |     | —               | —                       |                 |
| 1                                                            |     | 4,497,864       | 0.00, NA                | 0.986           |
| preoperative_dyspnea_0_no_1_yes                              | 254 |                 |                         |                 |
| 0                                                            |     | —               | —                       |                 |
| 1                                                            |     | 1.05            | 0.14, 5.50              | 0.956           |
| current_smoker_within_1_y_0_no_1_yes                         | 254 |                 |                         |                 |
| 0                                                            |     | —               | —                       |                 |
| 1                                                            |     | 0.42            | 0.18, 0.88              | <b>0.029</b>    |
| severe_copd_0_no_1_yes                                       | 254 |                 |                         |                 |
| 0                                                            |     | —               | —                       |                 |
| 1                                                            |     | 1.67            | 0.74, 3.70              | 0.208           |
| nsqip                                                        | 254 | 1.19            | 1.04, 1.36              | <b>0.011</b>    |
| hematological_cancer_0_no_1_yes                              | 254 |                 |                         |                 |
| 0                                                            |     | —               | —                       |                 |

| Characteristic                                                                                                                   | N   | OR <sup>1</sup> | 95 %<br>CI <sup>1</sup> | p-<br>valu<br>e |
|----------------------------------------------------------------------------------------------------------------------------------|-----|-----------------|-------------------------|-----------------|
| 1                                                                                                                                |     | 2.14            | 0.39, 11.8              | 0.358           |
| alohol_use_0_no_1_yes                                                                                                            | 254 |                 |                         |                 |
| 0                                                                                                                                |     | —               | —                       |                 |
| 1                                                                                                                                |     | 1.42            | 0.35, 5.11              | 0.596           |
| dementia_0_no_1_yes                                                                                                              | 254 |                 |                         |                 |
| 0                                                                                                                                |     | —               | —                       |                 |
| 1                                                                                                                                |     | 1.59            | 0.31, 7.40              | 0.547           |
| ischemic_heart_disease_history_of_mi_positive_exercise_test_current_chest_pain_use_of_nitrate_or_e<br>cg_with_q_waves_0_no_1_yes | 254 |                 |                         |                 |
| 0                                                                                                                                |     | —               | —                       |                 |
| 1                                                                                                                                |     | 1.12            | 0.48, 2.48              | 0.788           |
| cardiovascular_disease_prior_stroke_or_tia_5years_0_no_1_yes                                                                     | 254 |                 |                         |                 |
| 0                                                                                                                                |     | —               | —                       |                 |
| 1                                                                                                                                |     | 6.49            | 0.82, 13.2              | 0.108           |
| statins_0_no_1_yes                                                                                                               | 254 |                 |                         |                 |
| 0                                                                                                                                |     | —               | —                       |                 |
| 1                                                                                                                                |     | 1.15            | 0.57, 2.23              | 0.689           |
| ace_i_0_no_1_yes                                                                                                                 | 254 |                 |                         |                 |
| 0                                                                                                                                |     | —               | —                       |                 |
| 1                                                                                                                                |     | 1.81            | 0.93, 3.48              | 0.075           |

| Characteristic            | N           | OR <sup>1</sup> | 95<br>%<br>CI <sup>1</sup> | p-<br>valu<br>e   |
|---------------------------|-------------|-----------------|----------------------------|-------------------|
| arb_0_no_1_yes            | 2<br>5<br>4 |                 |                            |                   |
| 0                         |             | —               | —                          |                   |
| 1                         |             | 2.18            | 1.0<br>1,<br>4.6<br>9      | <b>0.04<br/>4</b> |
| beta_blockers_0_no_1_yes  | 2<br>5<br>4 |                 |                            |                   |
| 0                         |             | —               | —                          |                   |
| 1                         |             | 0.88            | 0.4<br>4,<br>1.6<br>9      | 0.70<br>0         |
| insulin_0_no_1_yes        | 2<br>5<br>4 |                 |                            |                   |
| 0                         |             | —               | —                          |                   |
| 1                         |             | 1.05            | 0.2<br>2,<br>4.0<br>9      | 0.94<br>5         |
| ppi_0_no_1_yes            | 2<br>5<br>4 |                 |                            |                   |
| 0                         |             | —               | —                          |                   |
| 1                         |             | 1.49            | 0.8<br>8,<br>2.5<br>6      | 0.14<br>3         |
| nsai_ds_0_no_1_yes        | 2<br>5<br>4 |                 |                            |                   |
| 0                         |             | —               | —                          |                   |
| 1                         |             | 1.48            | 0.7<br>0,<br>3.0<br>6      | 0.29<br>5         |
| baseline_serum_creatinine | 2<br>5<br>4 | 1.01            | 1.0<br>0,<br>1.0<br>2      | 0.07<br>6         |
| preoperative_urea         | 2<br>3<br>0 | 1.01            | 0.8<br>8,<br>1.1<br>5      | 0.87<br>2         |
| e_gfr                     | 2<br>5<br>4 | 0.98            | 0.9<br>7,<br>1.0<br>0      | <b>0.04<br/>0</b> |

| Characteristic                                                                | N   | OR <sup>1</sup> | 95<br>%<br>CI <sup>1</sup> | p-<br>valu<br>e |
|-------------------------------------------------------------------------------|-----|-----------------|----------------------------|-----------------|
| preop_hemoglobin                                                              | 248 | 0.94            | 0.79, 1.11                 | 0.464           |
| preop_wbc                                                                     | 210 | 1.06            | 0.94, 1.20                 | 0.355           |
| preop_platelets                                                               | 244 | 1.00            | 1.00, 1.00                 | 0.706           |
| atrial_fibrillation_0_no_1_yes                                                | 254 |                 |                            |                 |
| 0                                                                             |     | —               | —                          |                 |
| 1                                                                             |     | 1.42            | 0.35, 5.11                 | 0.596           |
| fe_45_percent_0_no_1_yes                                                      | 254 |                 |                            |                 |
| 0                                                                             |     | —               | —                          |                 |
| 1                                                                             |     | 1.59            | 0.31, 7.40                 | 0.547           |
| carotid_stenosis_0_no_1_yes                                                   | 254 |                 |                            |                 |
| 0                                                                             |     | —               | —                          |                 |
| 1                                                                             |     | 0.77            | 0.27, 1.95                 | 0.600           |
| mini_invasive_surgery_2_mini_invasive_3_partially_invasive_4_totally_invasive | 254 |                 |                            |                 |
| 2                                                                             |     | —               | —                          |                 |
| 3                                                                             |     | 6.88            | 1.44, 36.0                 | <b>0.017</b>    |
| 4                                                                             |     | 2.89            | 1.23, 7.96                 | <b>0.023</b>    |
| tri_incisional_surgery_0_no_1_yes                                             | 254 |                 |                            |                 |
| 0                                                                             |     | —               | —                          |                 |

| Characteristic                                                         | N   | OR <sup>1</sup> | 95<br>%<br>CI <sup>1</sup> | p-<br>valu<br>e |
|------------------------------------------------------------------------|-----|-----------------|----------------------------|-----------------|
| 1                                                                      |     | 0.37            | 0.06, 1.40                 | 0.198           |
| type_of_anesthesia_1_inhaled_2_tiva_3_epidural_inhaled_4_peidural_tiva | 248 |                 |                            |                 |
| 1                                                                      |     | —               | —                          |                 |
| 2                                                                      |     | 0.00            |                            | 0.987           |
| 3                                                                      |     | 0.00            |                            | 0.988           |
| 4                                                                      |     | 0.00            |                            | 0.987           |
| anesthesia_duration_h                                                  | 251 | 1.00            | 0.82, 1.22                 | 0.964           |
| intraop_lidocaine_0_no_1_yes                                           | 248 |                 |                            |                 |
| 0                                                                      |     | —               | —                          |                 |
| 1                                                                      |     | 0.47            | 0.11, 1.52                 | 0.254           |
| intraop_magnesium_0_no_1_yes                                           | 248 |                 |                            |                 |
| 0                                                                      |     | —               | —                          |                 |
| 1                                                                      |     | 1.06            | 0.56, 1.96                 | 0.866           |
| intraop_dexamethasone_0_no_1_yes                                       | 248 |                 |                            |                 |
| 0                                                                      |     | —               | —                          |                 |
| 1                                                                      |     | 1.11            | 0.62, 2.02                 | 0.721           |
| intraop_ranitidine_0_no_1_yes                                          | 248 |                 |                            |                 |
| 0                                                                      |     | —               | —                          |                 |
| 1                                                                      |     | 0.70            | 0.41, 1.20                 | 0.194           |

| Characteristic                                            | N           | OR <sup>1</sup> | 95<br>%<br>CI <sup>1</sup> | p-<br>valu<br>e |
|-----------------------------------------------------------|-------------|-----------------|----------------------------|-----------------|
| intraop_ppi_0_no_1_yes                                    | 2<br>4<br>7 |                 |                            |                 |
| 0                                                         |             | —               | —                          |                 |
| 1                                                         |             | 1.37            | 0.8<br>0,<br>2.3<br>6      | 0.24<br>5       |
| intraop_nmb_1_rocuronium_2_cisatracurium                  | 2<br>4<br>5 |                 |                            |                 |
| 1                                                         |             | —               | —                          |                 |
| 2                                                         |             | 1.60            | 0.3<br>1,<br>7.4<br>2      | 0.54<br>6       |
| intraop_reversal_0_no_reversal_1_neostigmine_2_sugammadex | 2<br>4<br>3 |                 |                            |                 |
| 0                                                         |             | —               | —                          |                 |
| 1                                                         |             | 0.93            | 0.3<br>3,<br>2.4<br>2      | 0.88<br>0       |
| 2                                                         |             | 0.71            | 0.4<br>0,<br>1.2<br>5      | 0.23<br>5       |
| intraop_min_sp_o2_fi_o2                                   | 2<br>4<br>8 | 1.00            | 0.9<br>9,<br>1.0<br>1      | 0.80<br>9       |
| intraop_min_sbp_mm_hg                                     | 2<br>4<br>7 | 1.02            | 0.9<br>9,<br>1.0<br>5      | 0.16<br>2       |
| intraop_volume_ml                                         | 2<br>4<br>7 | 1.00            | 1.0<br>0,<br>1.0<br>0      | 0.55<br>9       |
| intraop_colloid_0_no_1_yes                                | 2<br>4<br>7 |                 |                            |                 |
| 0                                                         |             | —               | —                          |                 |
| 1                                                         |             | 1.19            | 0.3<br>6,<br>3.5<br>8      | 0.75<br>8       |
| intraop_blood_loss_ml                                     | 2<br>4<br>6 | 1.00            | 1.0<br>0,<br>1.0<br>0      | 0.19<br>3       |

| Characteristic                        | N           | OR <sup>1</sup> | 95<br>%<br>CI <sup>1</sup> | p-<br>valu<br>e |
|---------------------------------------|-------------|-----------------|----------------------------|-----------------|
| intraop_blood_transfusions_0_no_1_yes | 2<br>4<br>7 |                 |                            |                 |
| 0                                     |             | —               | —                          |                 |
| 1                                     |             | 2.24            | 0.7<br>4,<br>6.7<br>6      | 0.14<br>6       |
| volume_infused_ml_kg_h                | 2<br>4<br>7 | 0.96            | 0.8<br>7,<br>1.0<br>5      | 0.40<br>7       |
| hb_end_surgery                        | 2<br>4<br>1 | 0.92            | 0.7<br>6,<br>1.1<br>1      | 0.37<br>1       |
| lactates_end_surgery                  | 7<br>4      | 0.93            | 0.4<br>6,<br>1.7<br>9      | 0.83<br>3       |
| intraop_vasopressors_0_no_1_yes       | 2<br>4<br>7 |                 |                            |                 |
| 0                                     |             | —               | —                          |                 |
| 1                                     |             | 1.30            | 0.4<br>3,<br>3.6<br>3      | 0.62<br>6       |
| vasopressor_max_dose                  | 1<br>6      | 0.00            | 0.0<br>0,<br>57<br>7       | 0.39<br>1       |
| intraop_inotropes_0_no_1_yes          | 2<br>4<br>7 |                 |                            |                 |
| 0                                     |             | —               | —                          |                 |
| 1                                     |             | 1.17            | 0.3<br>9,<br>3.2<br>1      | 0.76<br>2       |
| inotrope_max_dose                     | 1<br>7      | 0.99            | 0.3<br>7,<br>2.6<br>5      | 0.97<br>7       |
| intraop_arrhythmia_0_no_1_yes         | 2<br>4<br>8 |                 |                            |                 |
| 0                                     |             | —               | —                          |                 |
| 1                                     |             | 2.18            | 0.4<br>0,<br>12.<br>0      | 0.34<br>5       |



| Characteristic                          | N   | OR <sup>1</sup> | 95<br>%<br>CI <sup>1</sup> | p-<br>valu<br>e |
|-----------------------------------------|-----|-----------------|----------------------------|-----------------|
| diuresis_end_of_surgery_ml              | 246 | 1.00            | 1.00, 1.00                 | 0.141           |
| diuresis_endsurgery_ml_kg_h             | 246 | 0.70            | 0.48, 0.97                 | <b>0.046</b>    |
| intraop_diuretics_0_no_1_yes            | 248 |                 |                            |                 |
| 0                                       |     | —               | —                          |                 |
| 1                                       |     | 1.49            | 0.62, 3.44                 | 0.359           |
| intraop_nsai_ds_0_no_1_yes              | 248 |                 |                            |                 |
| 0                                       |     | —               | —                          |                 |
| 1                                       |     | 1.70            | 0.99, 2.93                 | 0.054           |
| monitor_in_pacu_0_no_1_yes              | 254 |                 |                            |                 |
| 0                                       |     | —               | —                          |                 |
| 1                                       |     | 0.75            | 0.38, 1.41                 | 0.385           |
| monitor_in_icu_0_no_1_yes               | 254 |                 |                            |                 |
| 0                                       |     | —               | —                          |                 |
| 1                                       |     | 1.37            | 0.73, 2.68                 | 0.334           |
| extubation_at_end_of_surgery_0_no_1_yes | 253 |                 |                            |                 |
| 0                                       |     | —               | —                          |                 |
| 1                                       |     | 1.03            | 0.61, 1.76                 | 0.901           |
| intraop_aki_0_no_1_yes                  | 246 |                 |                            |                 |
| 0                                       |     | —               | —                          |                 |

| Characteristic | N | OR <sup>1</sup> | 95<br>%<br>CI <sup>1</sup> | p-<br>valu<br>e |
|----------------|---|-----------------|----------------------------|-----------------|
| 1              |   | 2.15            | 0.9<br>5,<br>4.8<br>5      | 0.06<br>3       |

<sup>1</sup>OR = Odds Ratio, CI = Confidence Interval
